# Supplementary material for: Epstein–Barr virus infection and genome polymorphisms on gastric remnant carcinoma: a meta-analysis
Source: Springer Nature journal article supplement (doi:10.1186/s12935-020-01498-z), 2020-08-18
Supplement: MOESM1 [file 18293640]

Table S1: The main characteristics about EBV infection in Billroth-I and Billroth-II

| Author    | Year | Country | Billroth-I | Billroth-I | Billroth-II | Billroth-II | OR   |
|-----------|------|---------|------------|------------|-------------|-------------|------|
|           |      |         | EBV+       | EBV-       | EBV+        | EBV-        |      |
| Yamamoto  | 1994 | Japan   | 3          | 10         | 9           | 24          | 0.80 |
| Liu       | 2016 | China   | 3          | 28         | 10          | 12          | 0.13 |
| Kaizaki   | 2005 | Japan   | 4          | 28         | 14          | 32          | 0.33 |
| Nishikawa | 2002 | Sweden  | 0          | 5          | 7           | 5           | -    |
| Tanigawa  | 2000 | Japan   | 1          | 16         | 9           | 19          | 0.13 |
| Chen      | 2011 | China   | 0          | 1          | 8           | 17          | -    |

EBV: Epstein-Barr virus

OR: odds ratio

Table S2: The main characteristics about EBV infection in benign and malignant tumor

| Author   | Year | Country | benign | benign | malignant | malignant | OR   |
|----------|------|---------|--------|--------|-----------|-----------|------|
|          |      |         | EBV+   | EBV-   | EBV+      | EBV-      |      |
| Yamamoto | 1994 | Japan   | 12     | 33     | 1         | 2         | 0.73 |
| Chang    | 2003 | Korea   | 4      | 10     | 1         | 11        | 4.40 |
| Kaizaki  | 2005 | Japan   | 17     | 47     | 1         | 13        | 4.70 |

EBV: Epstein-Barr virus

OR: odds ratio

Table S3: The main characteristics about EBV infection in anastomotic stoma or not

| Author    | Year | Country | Anastomotic<br>stoma, EBV+ | Anastomotic<br>stoma, EBV- | Other, EBV+ | Other, EBV- | OR   |
|-----------|------|---------|----------------------------|----------------------------|-------------|-------------|------|
| Yamamoto  | 1994 | Japan   | 10                         | 28                         | 3           | 7           | 0.83 |
| Kaizaki   | 2005 | Japan   | 13                         | 26                         | 5           | 34          | 3.40 |
| Chang     | 2000 | Korea   | 4                          | 12                         | 1           | 9           | 3.00 |
| Nishikawa | 2002 | Sweden  | 6                          | 4                          | 1           | 6           | 9.00 |
| Tanigawa  | 2000 | Japan   | 8                          | 12                         | 2           | 23          | 7.67 |
| Chen      | 2011 | China   | 4                          | 12                         | 4           | 6           | 0.50 |

EBV: Epstein-Barr virus

OR: odds ratio

Table S4: The main characteristics about EBV infection under different Lauren classification

| Author    | Year | Country | Intestinal,<br>EBV+ | Intestinal,<br>EBV- | Diffuse,<br>EBV+ | Diffuse,<br>EBV- | OR   |
|-----------|------|---------|---------------------|---------------------|------------------|------------------|------|
| Yamamoto  | 1994 | Japan   | 6                   | 14                  | 7                | 21               | 1.29 |
| Liu       | 2016 | China   | 2                   | 7                   | 11               | 33               | 0.86 |
| Kaizaki   | 2005 | Japan   | 6                   | 37                  | 12               | 23               | 0.31 |
| Chang     | 2000 | Korea   | 2                   | 8                   | 2                | 13               | 1.63 |
| Nishikawa | 2002 | Sweden  | 0                   | 4                   | 7                | 6                | -    |
| Chen      | 2011 | China   | 0                   | 7                   | 8                | 11               | -    |

EBV: Epstein-Barr virus

OR: odds ratio

Table S5: The main characteristics about EBV infection in male and female

| Author    | Year | Country | Male, EBV+ | Male, EBV- | Female, EBV+ | Female, EBV- | OR   |
|-----------|------|---------|------------|------------|--------------|--------------|------|
| Liu       | 2016 | China   | 10         | 36         | 3            | 4            | 0.37 |
| Kaizaki   | 2005 | Japan   | 18         | 45         | 0            | 15           | -    |
| Chang     | 2000 | Korea   | 5          | 18         | 0            | 3            | -    |
| Nishikawa | 2002 | Sweden  | 6          | 8          | 1            | 2            | 1.50 |
| Chen      | 2011 | China   | 8          | 14         | 0            | 4            | -    |

EBV: Epstein-Barr virus

OR: odds ratio

Table S6: The main characteristics about EBV infection under different lymphocytic infiltration

| Author   | Year | Country | Mild, EBV+ | Mild, EBV- | Severe, EBV+ | Severe, EBV- | OR   |
|----------|------|---------|------------|------------|--------------|--------------|------|
| Yamamoto | 1994 | Japan   | 7          | 33         | 6            | 2            | 0.07 |
| Liu      | 2016 | China   | 3          | 10         | 10           | 30           | 0.90 |
| Kaizaki  | 2005 | Japan   | 12         | 51         | 6            | 9            | 0.35 |

EBV: Epstein-Barr virus

OR: odds ratio
