# Supplementary material for: Epstein–Barr virus infection and genome polymorphisms on gastric remnant carcinoma: a meta-analysis
Source: Springer Nature journal article supplement (doi:10.1186/s12935-020-01498-z), 2020-08-18

Begg's funnel plot with pseudo 95% confidence limits EBV infection in GRC and CGC

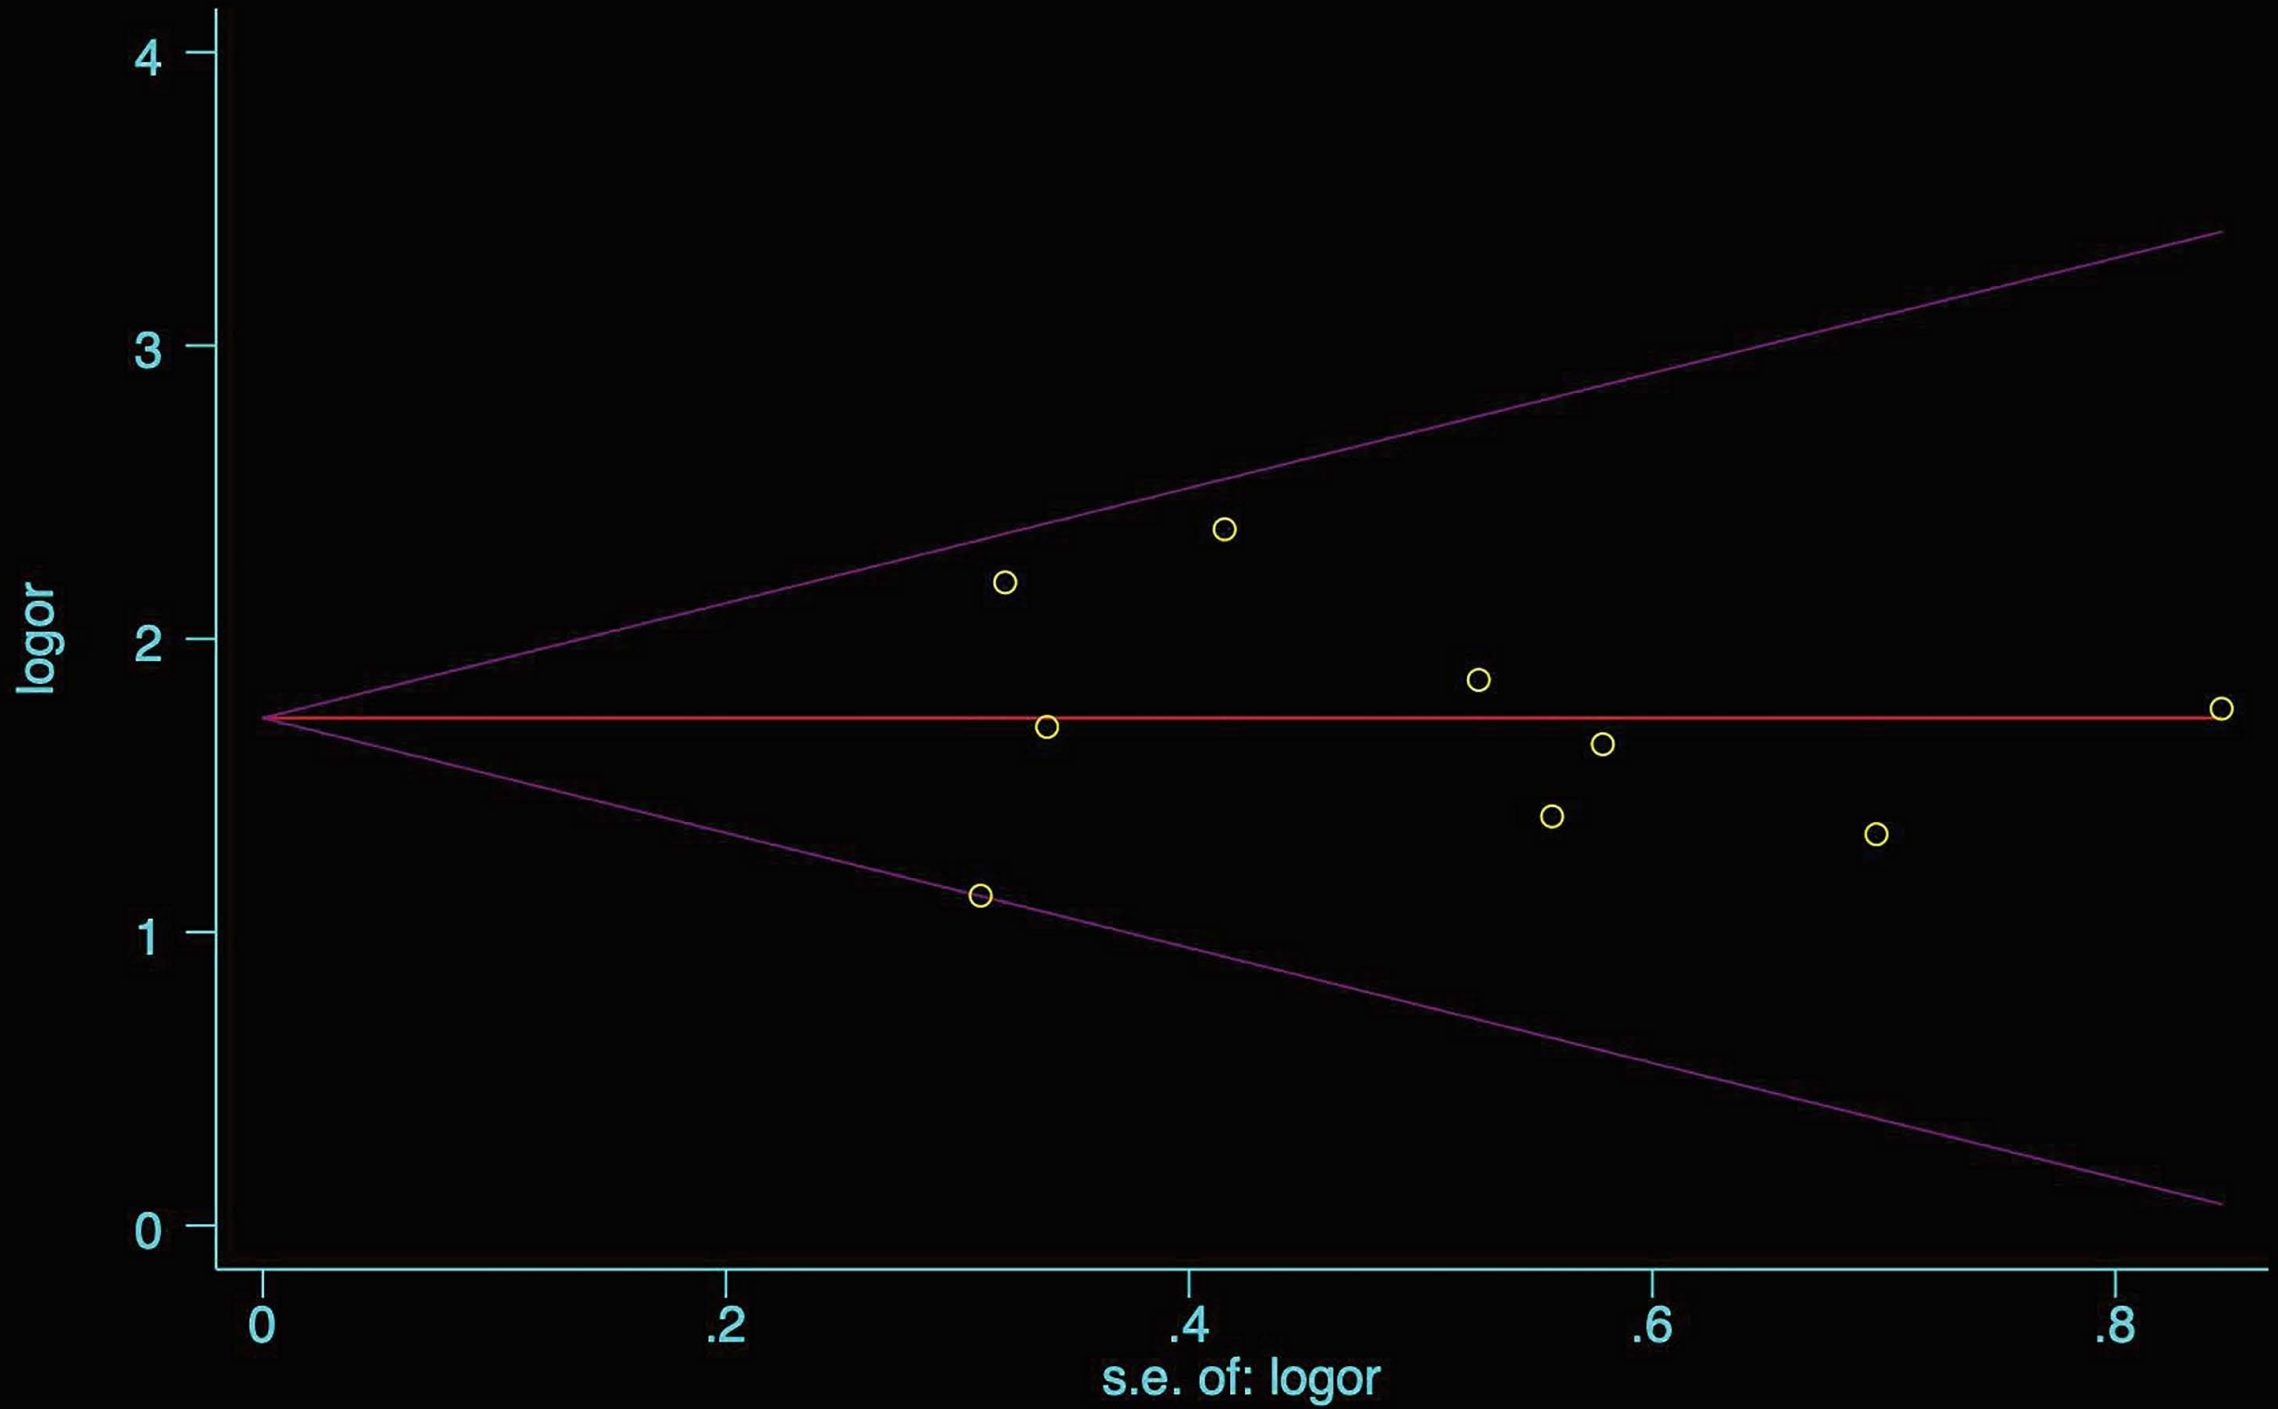

Begg's funnel plot with pseudo 95% confidence limits

Reconstruction style

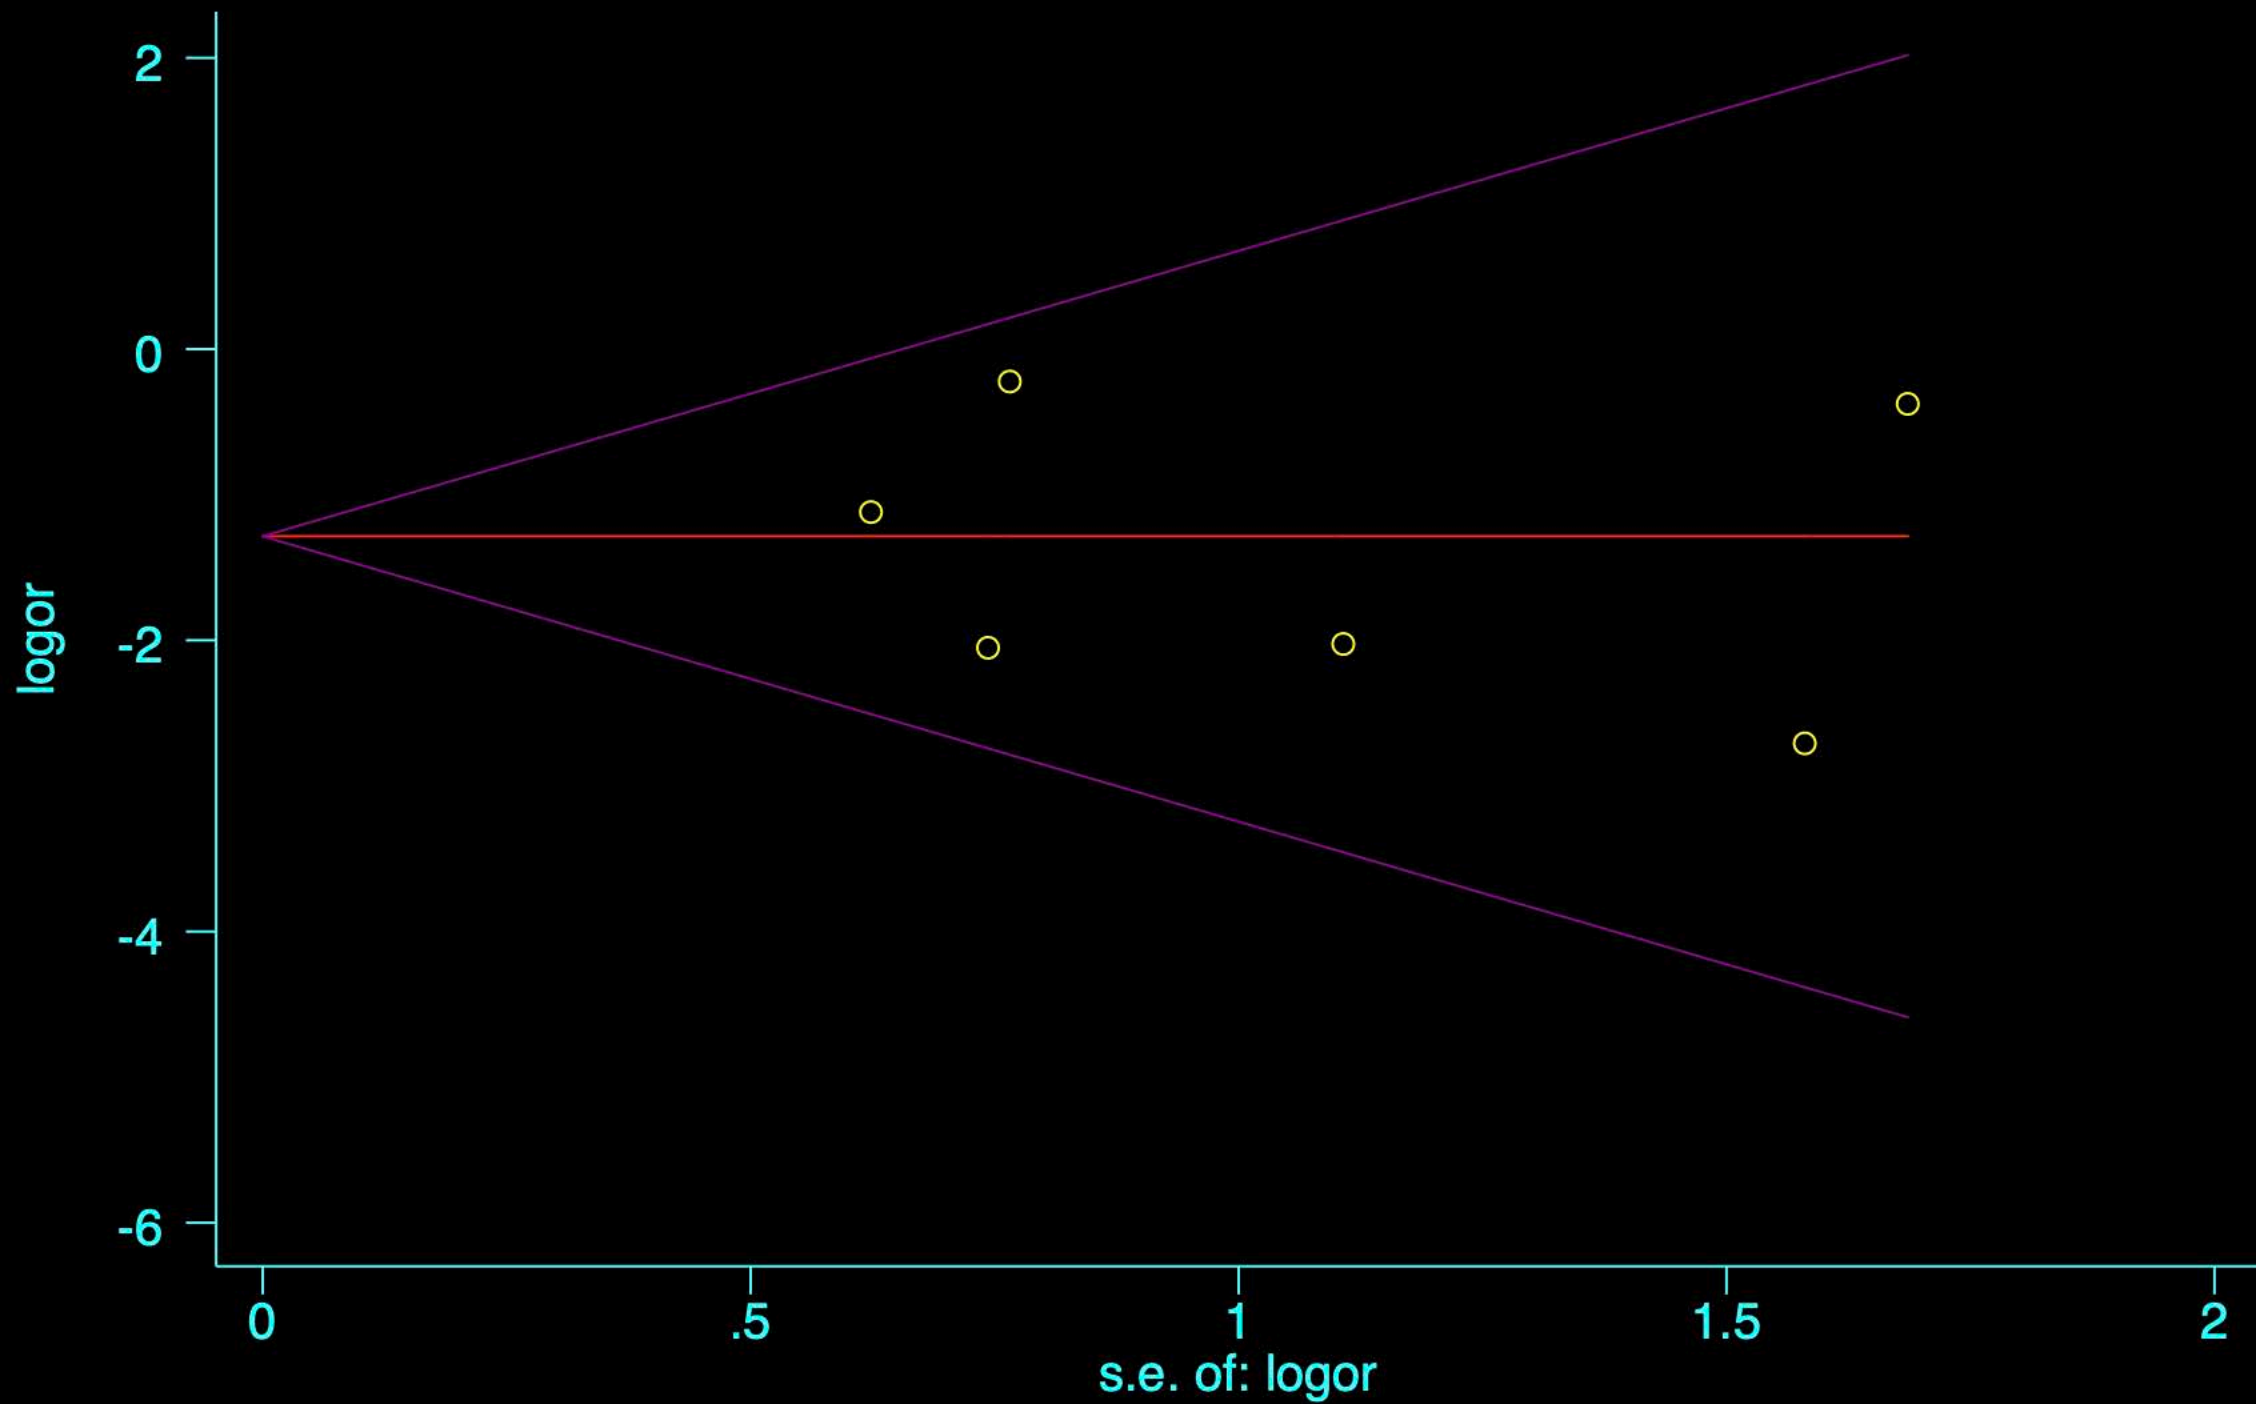

Begg's funnel plot with pseudo 95% confidence limits

Location of GRC

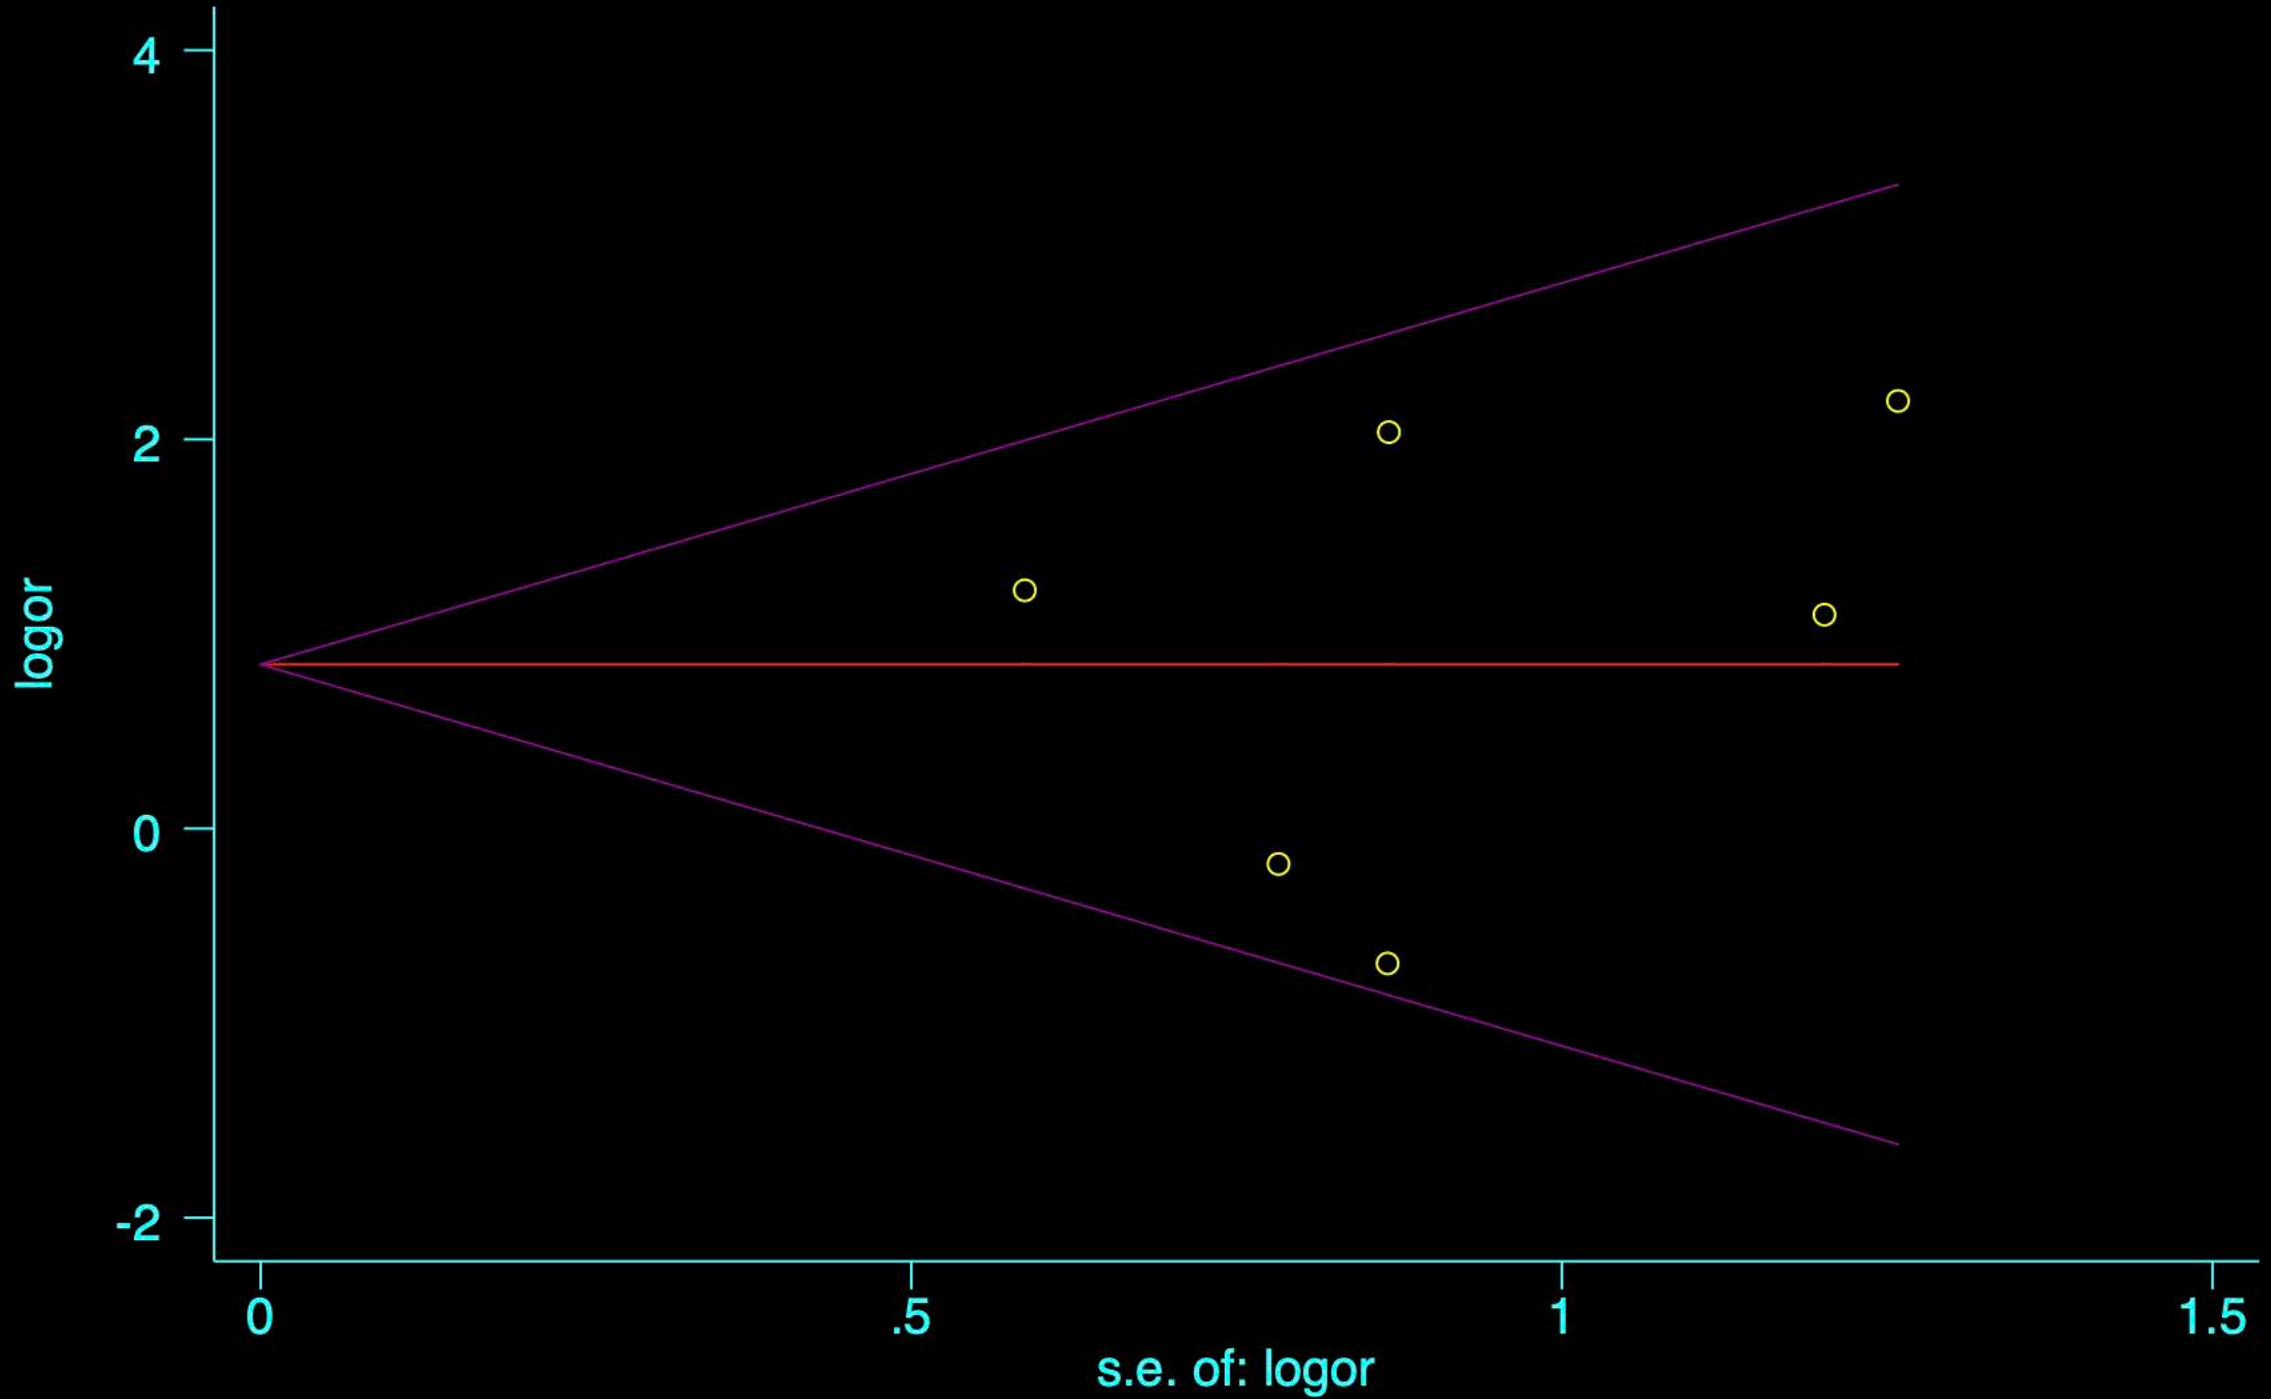

Begg's funnel plot with pseudo 95% confidence limits

Lauren classification

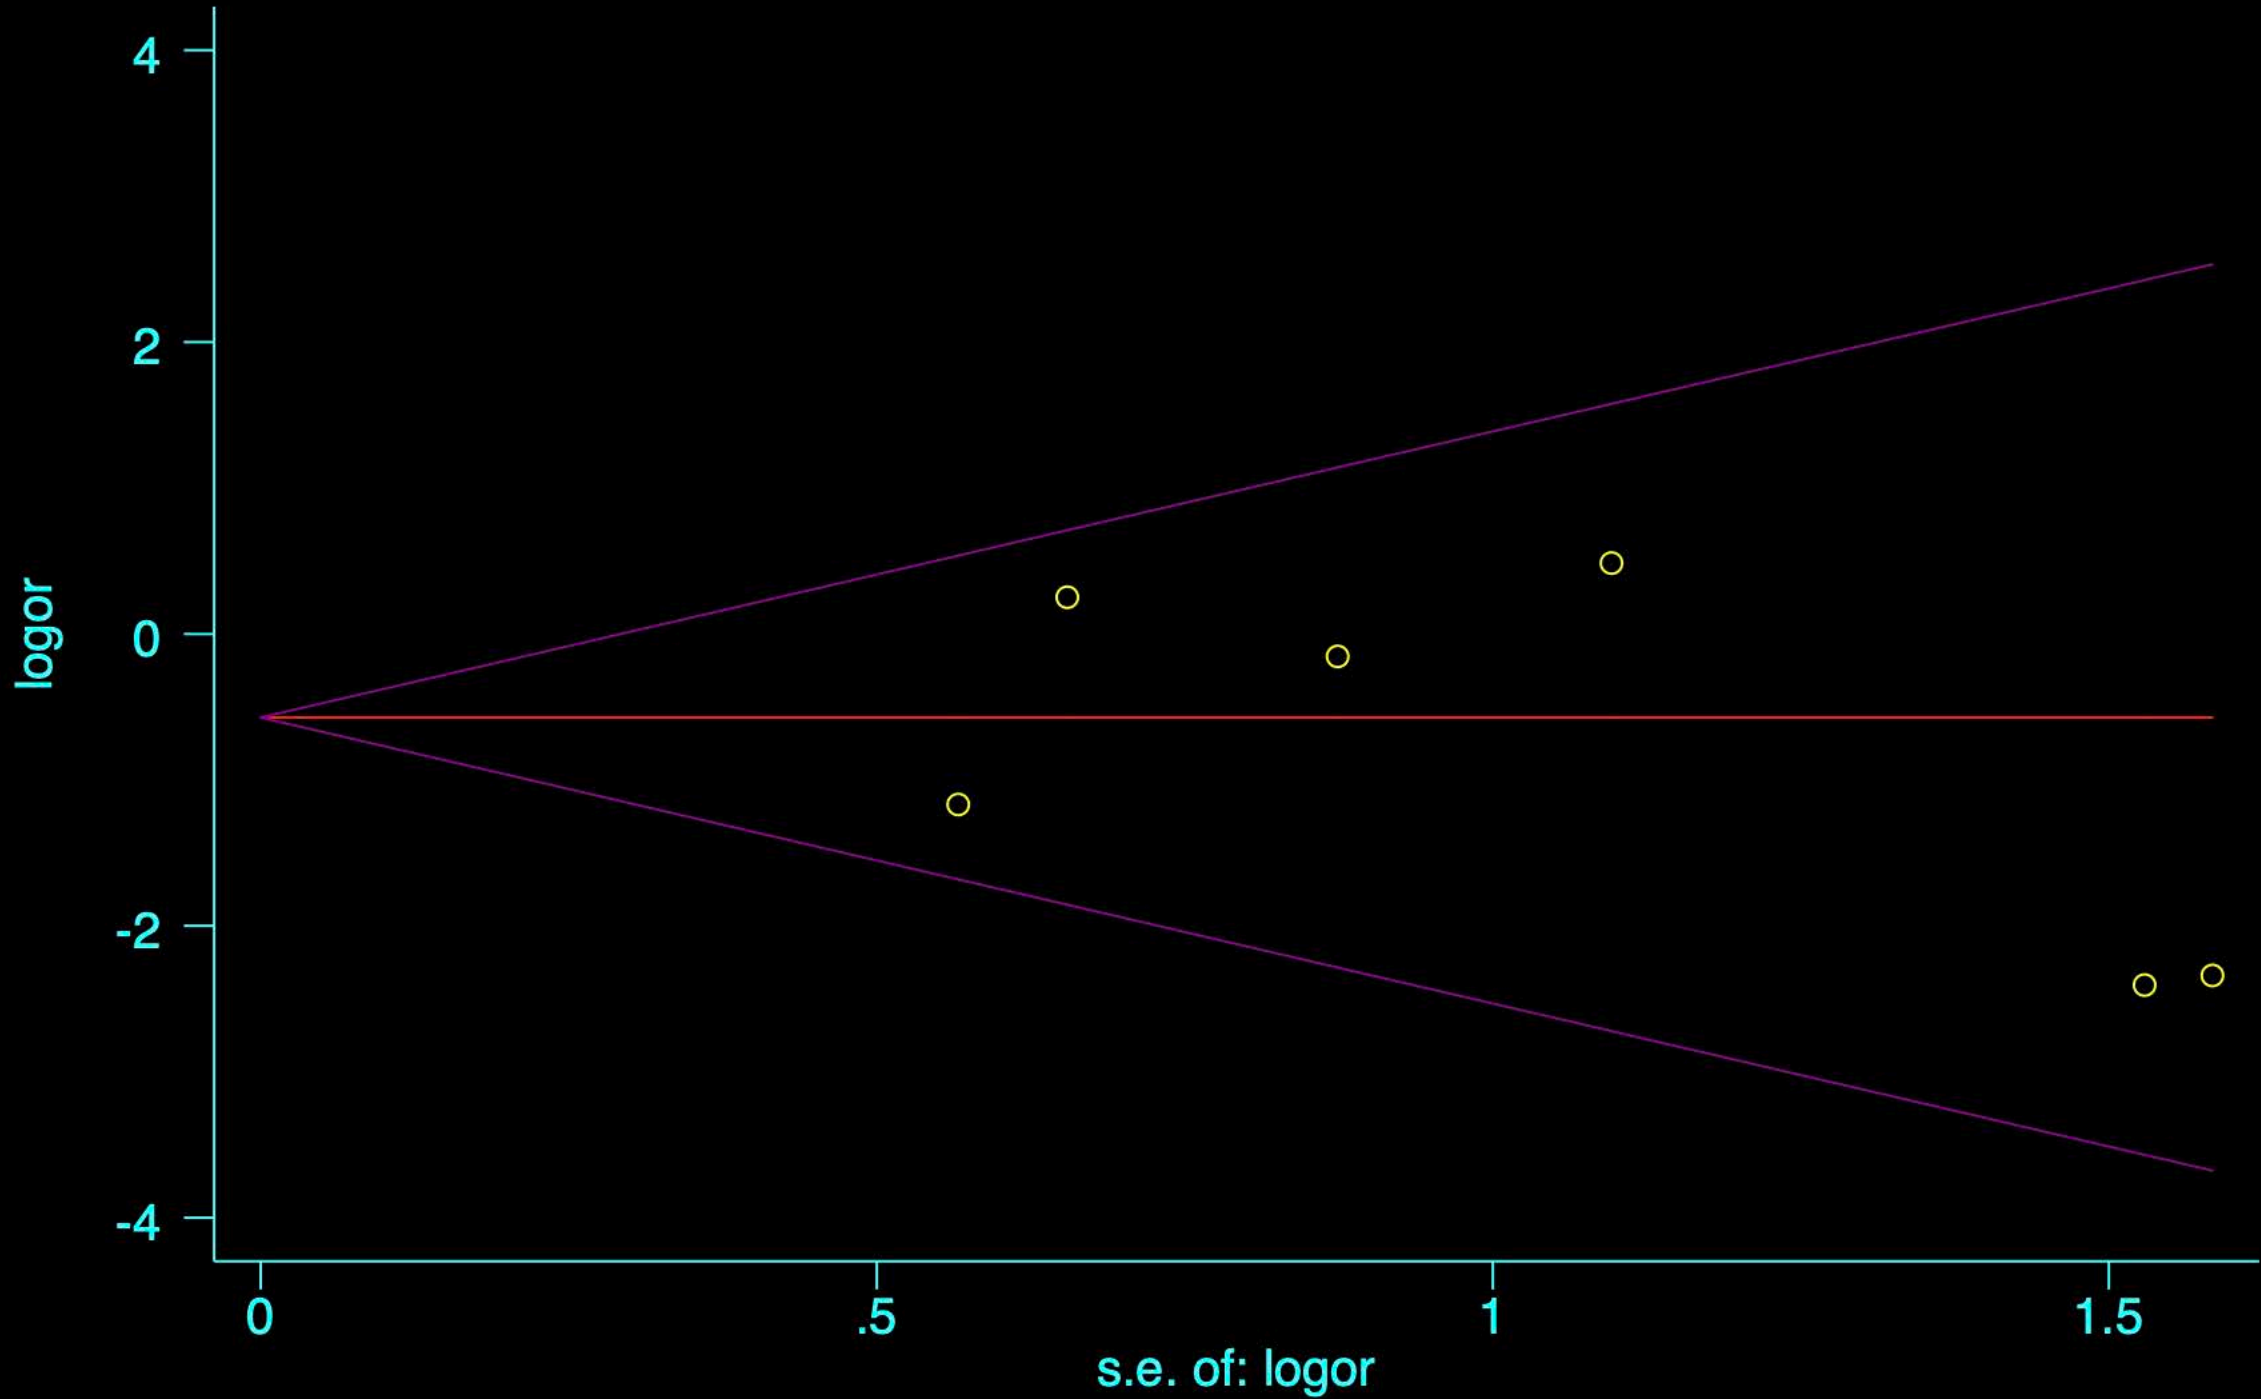

Begg's funnel plot with pseudo 95% confidence limits

Sex of patients

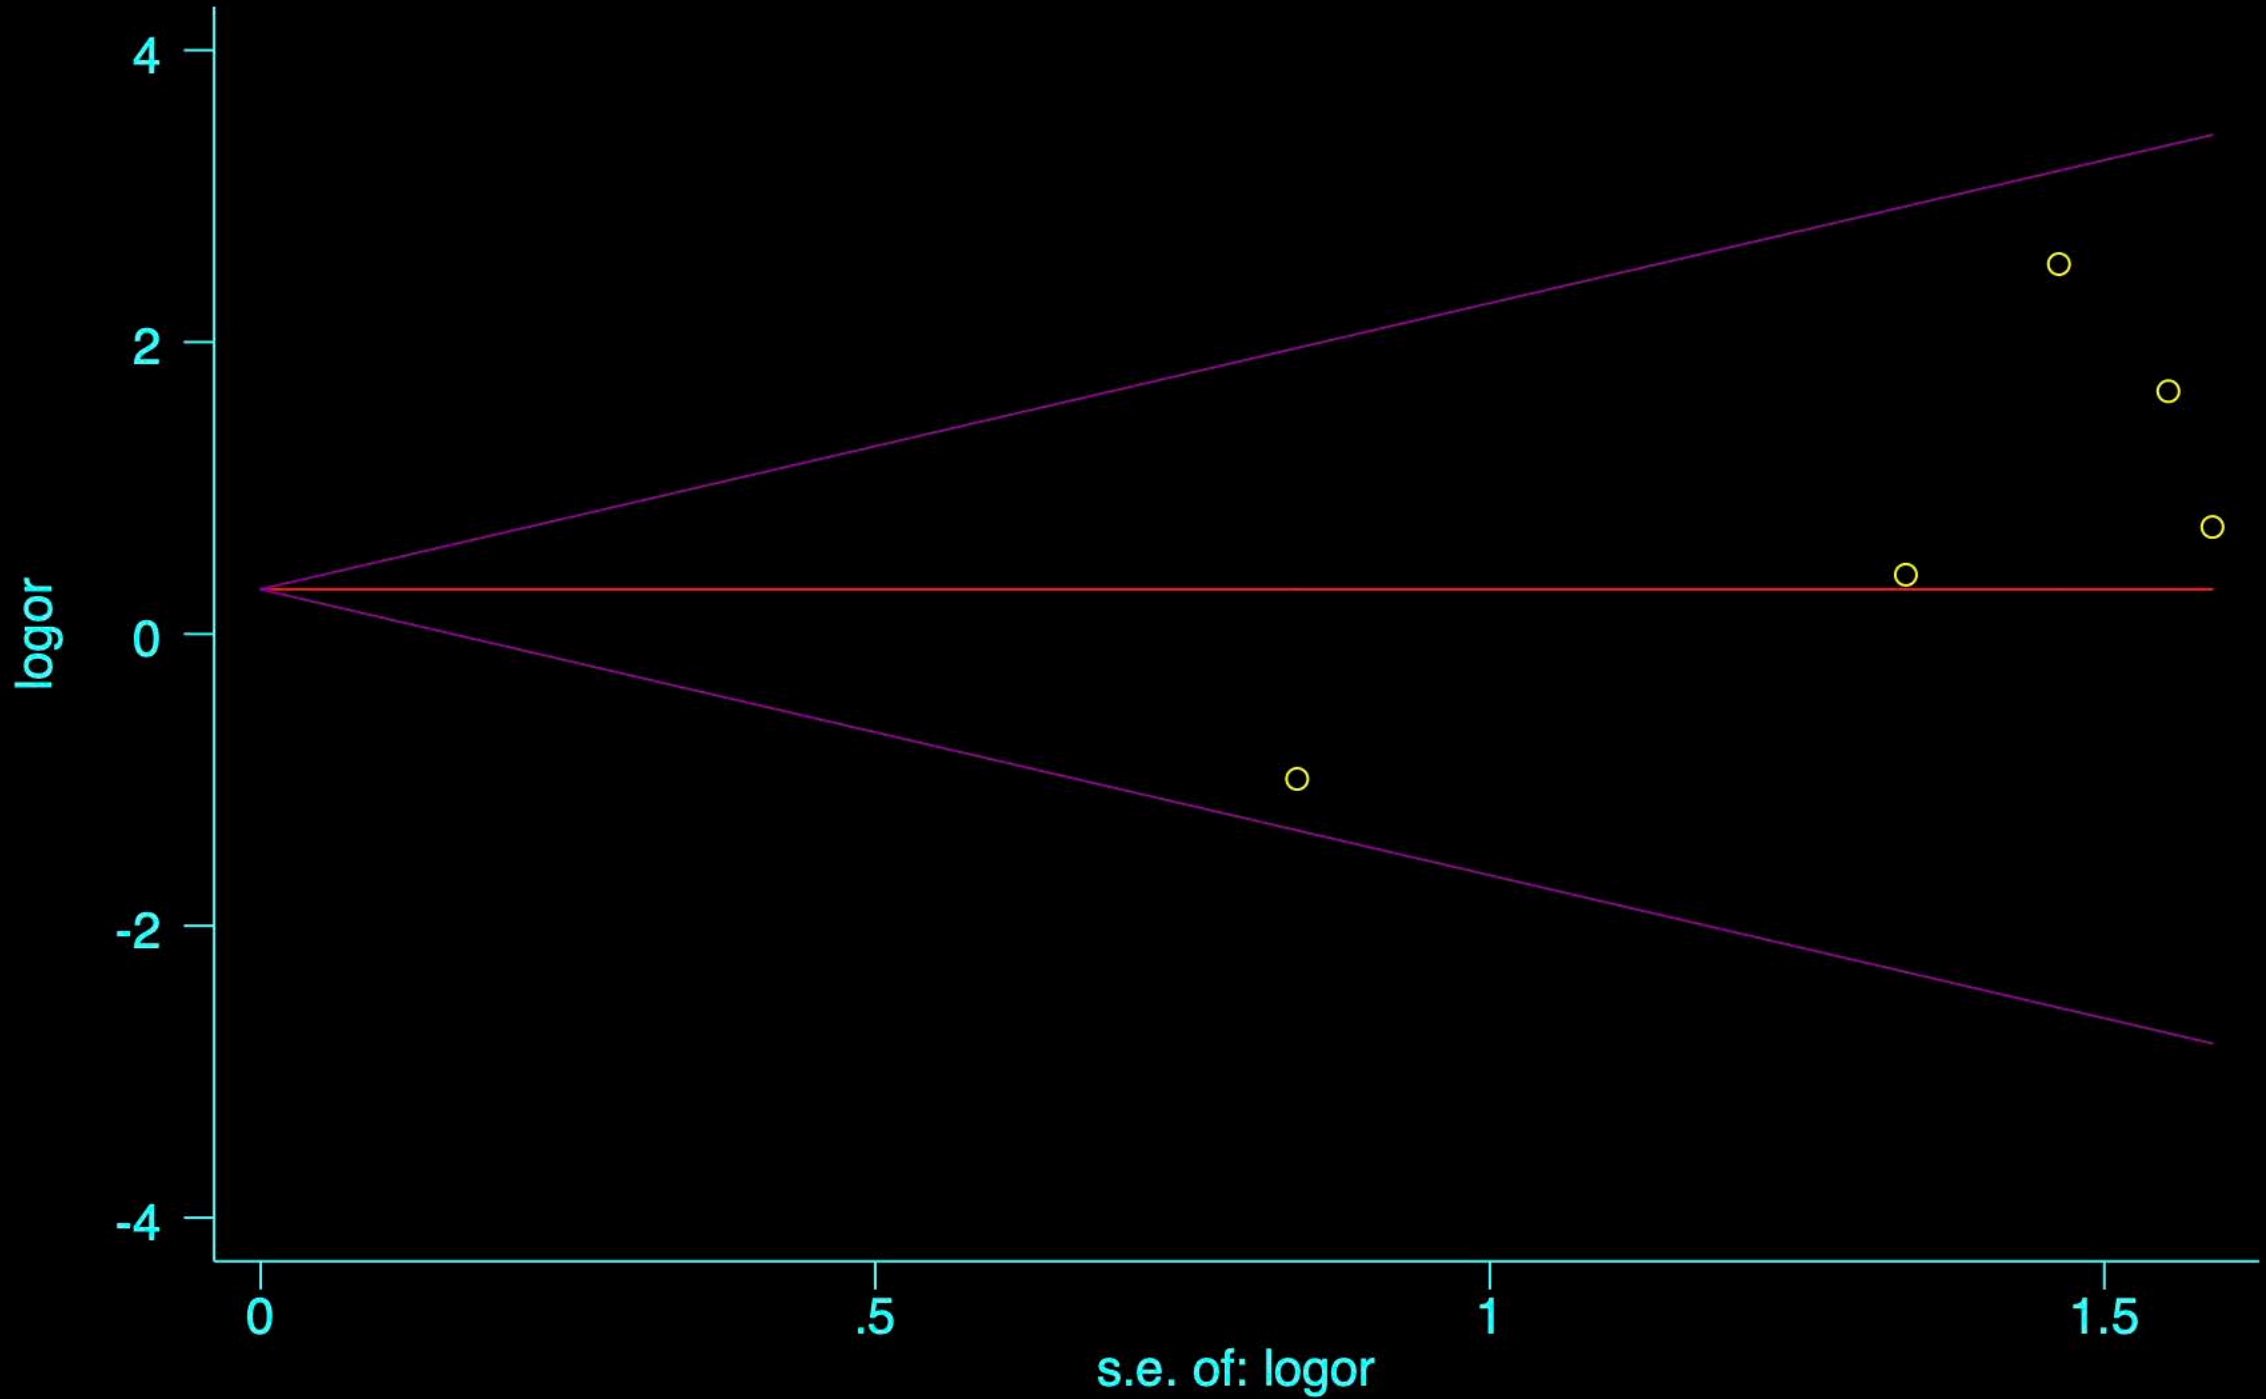

Begg's funnel plot with pseudo 95% confidence limits

Initial diagnosis

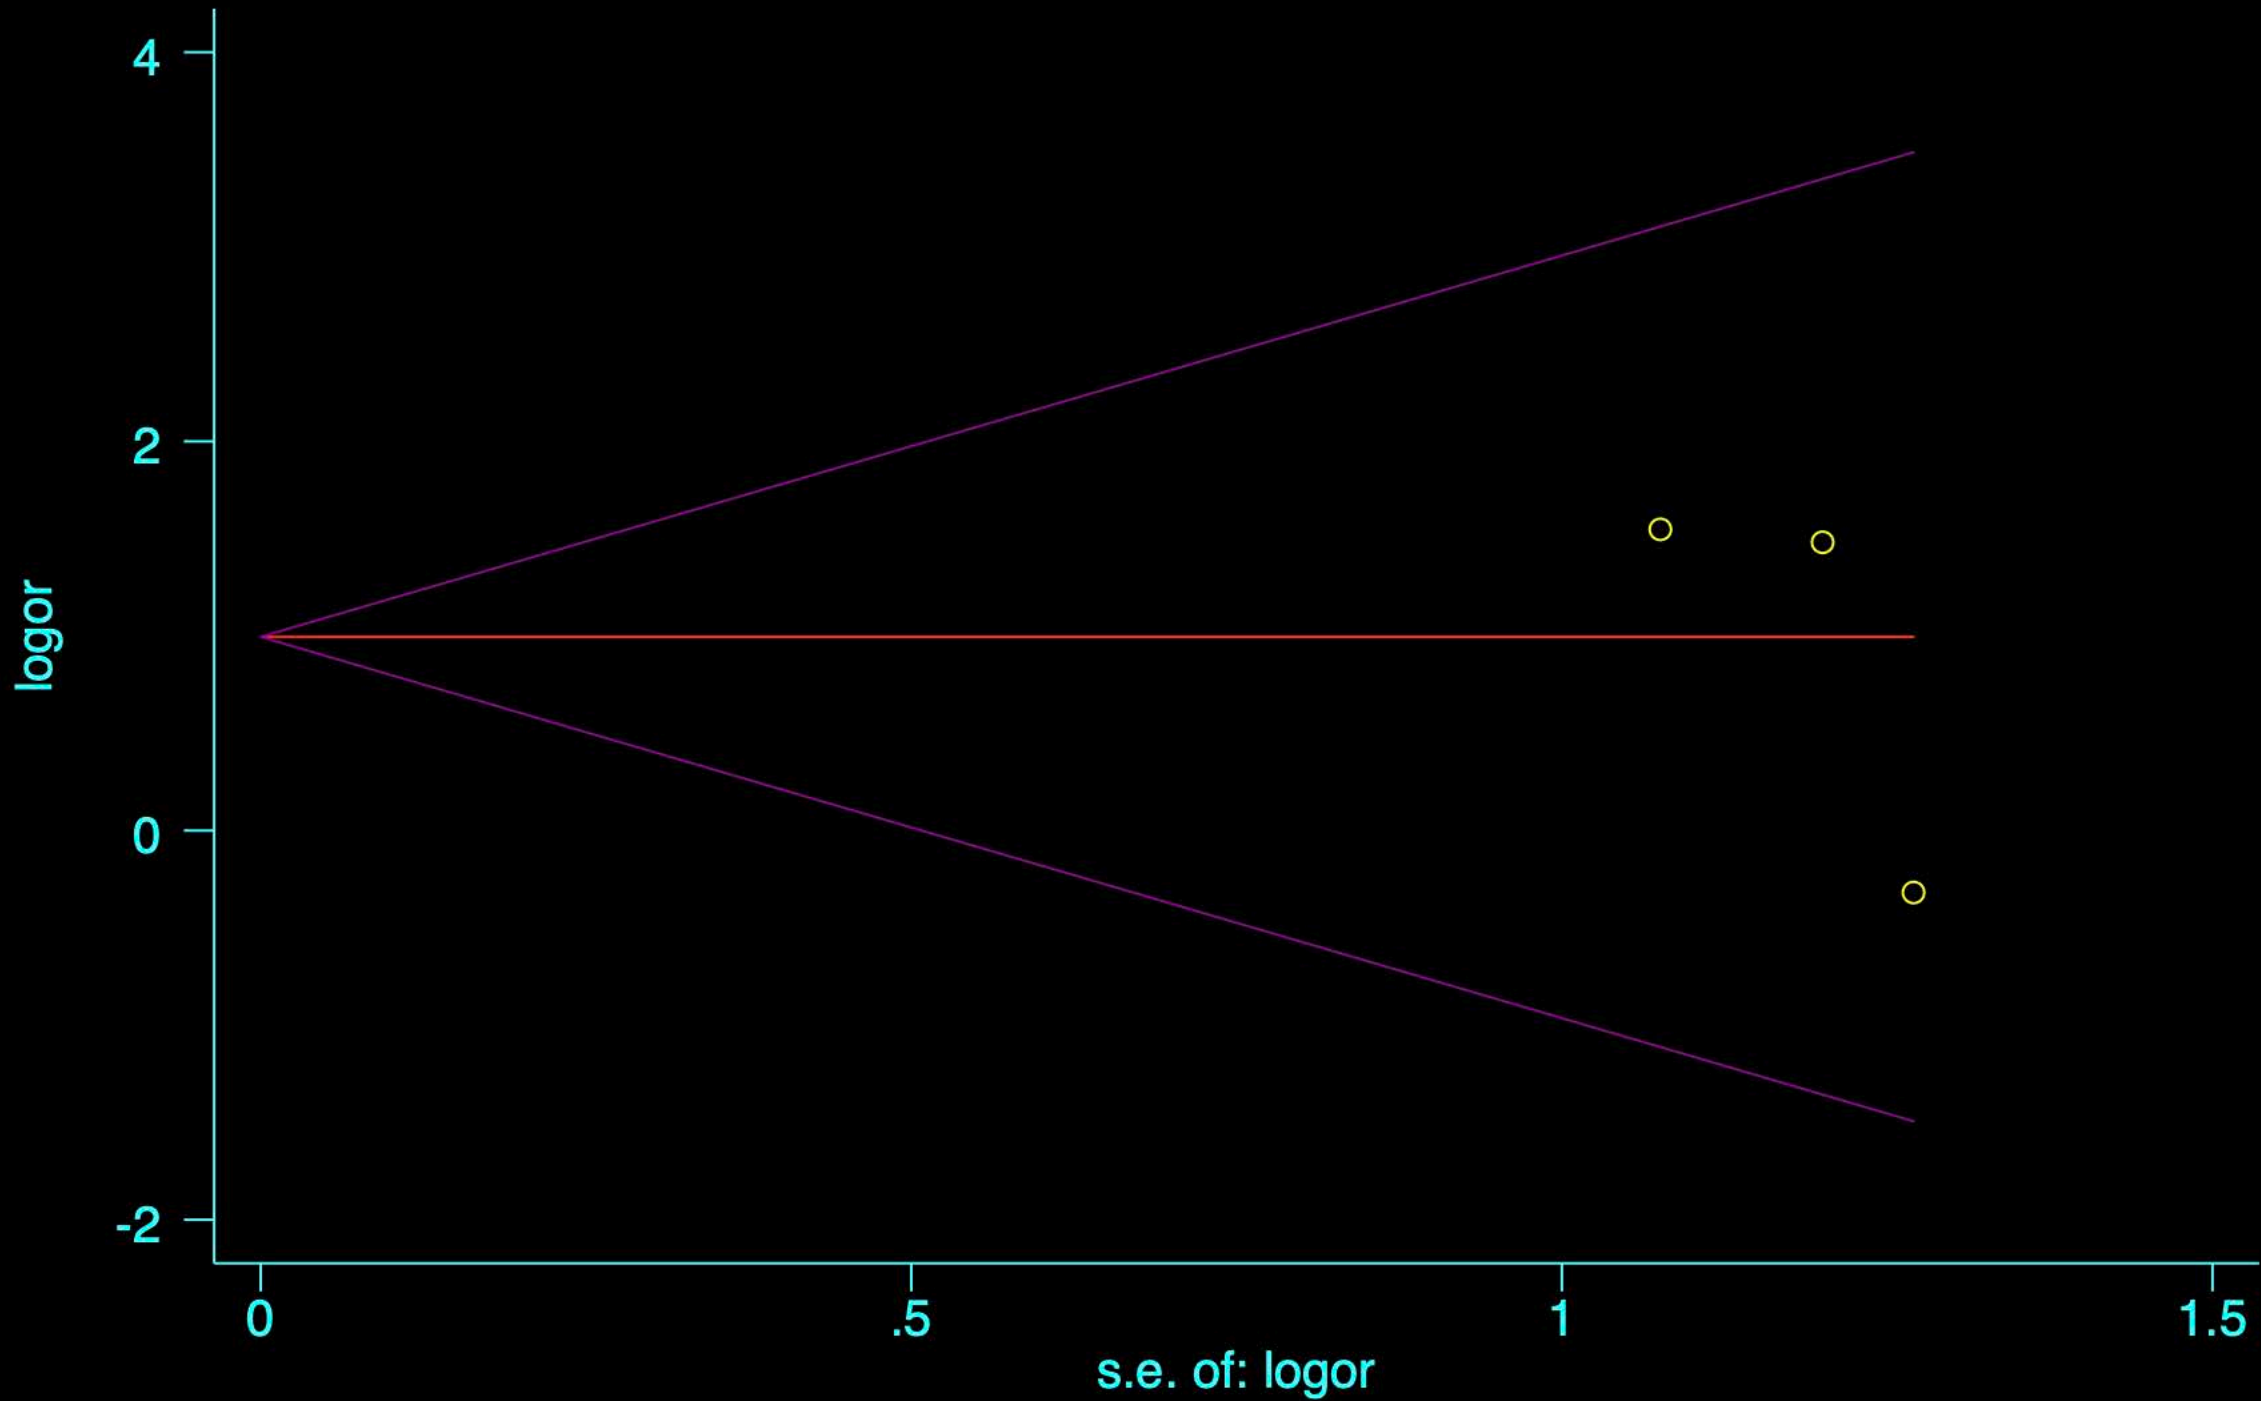

Begg's funnel plot with pseudo 95% confidence limits

Lymphocytic infiltration

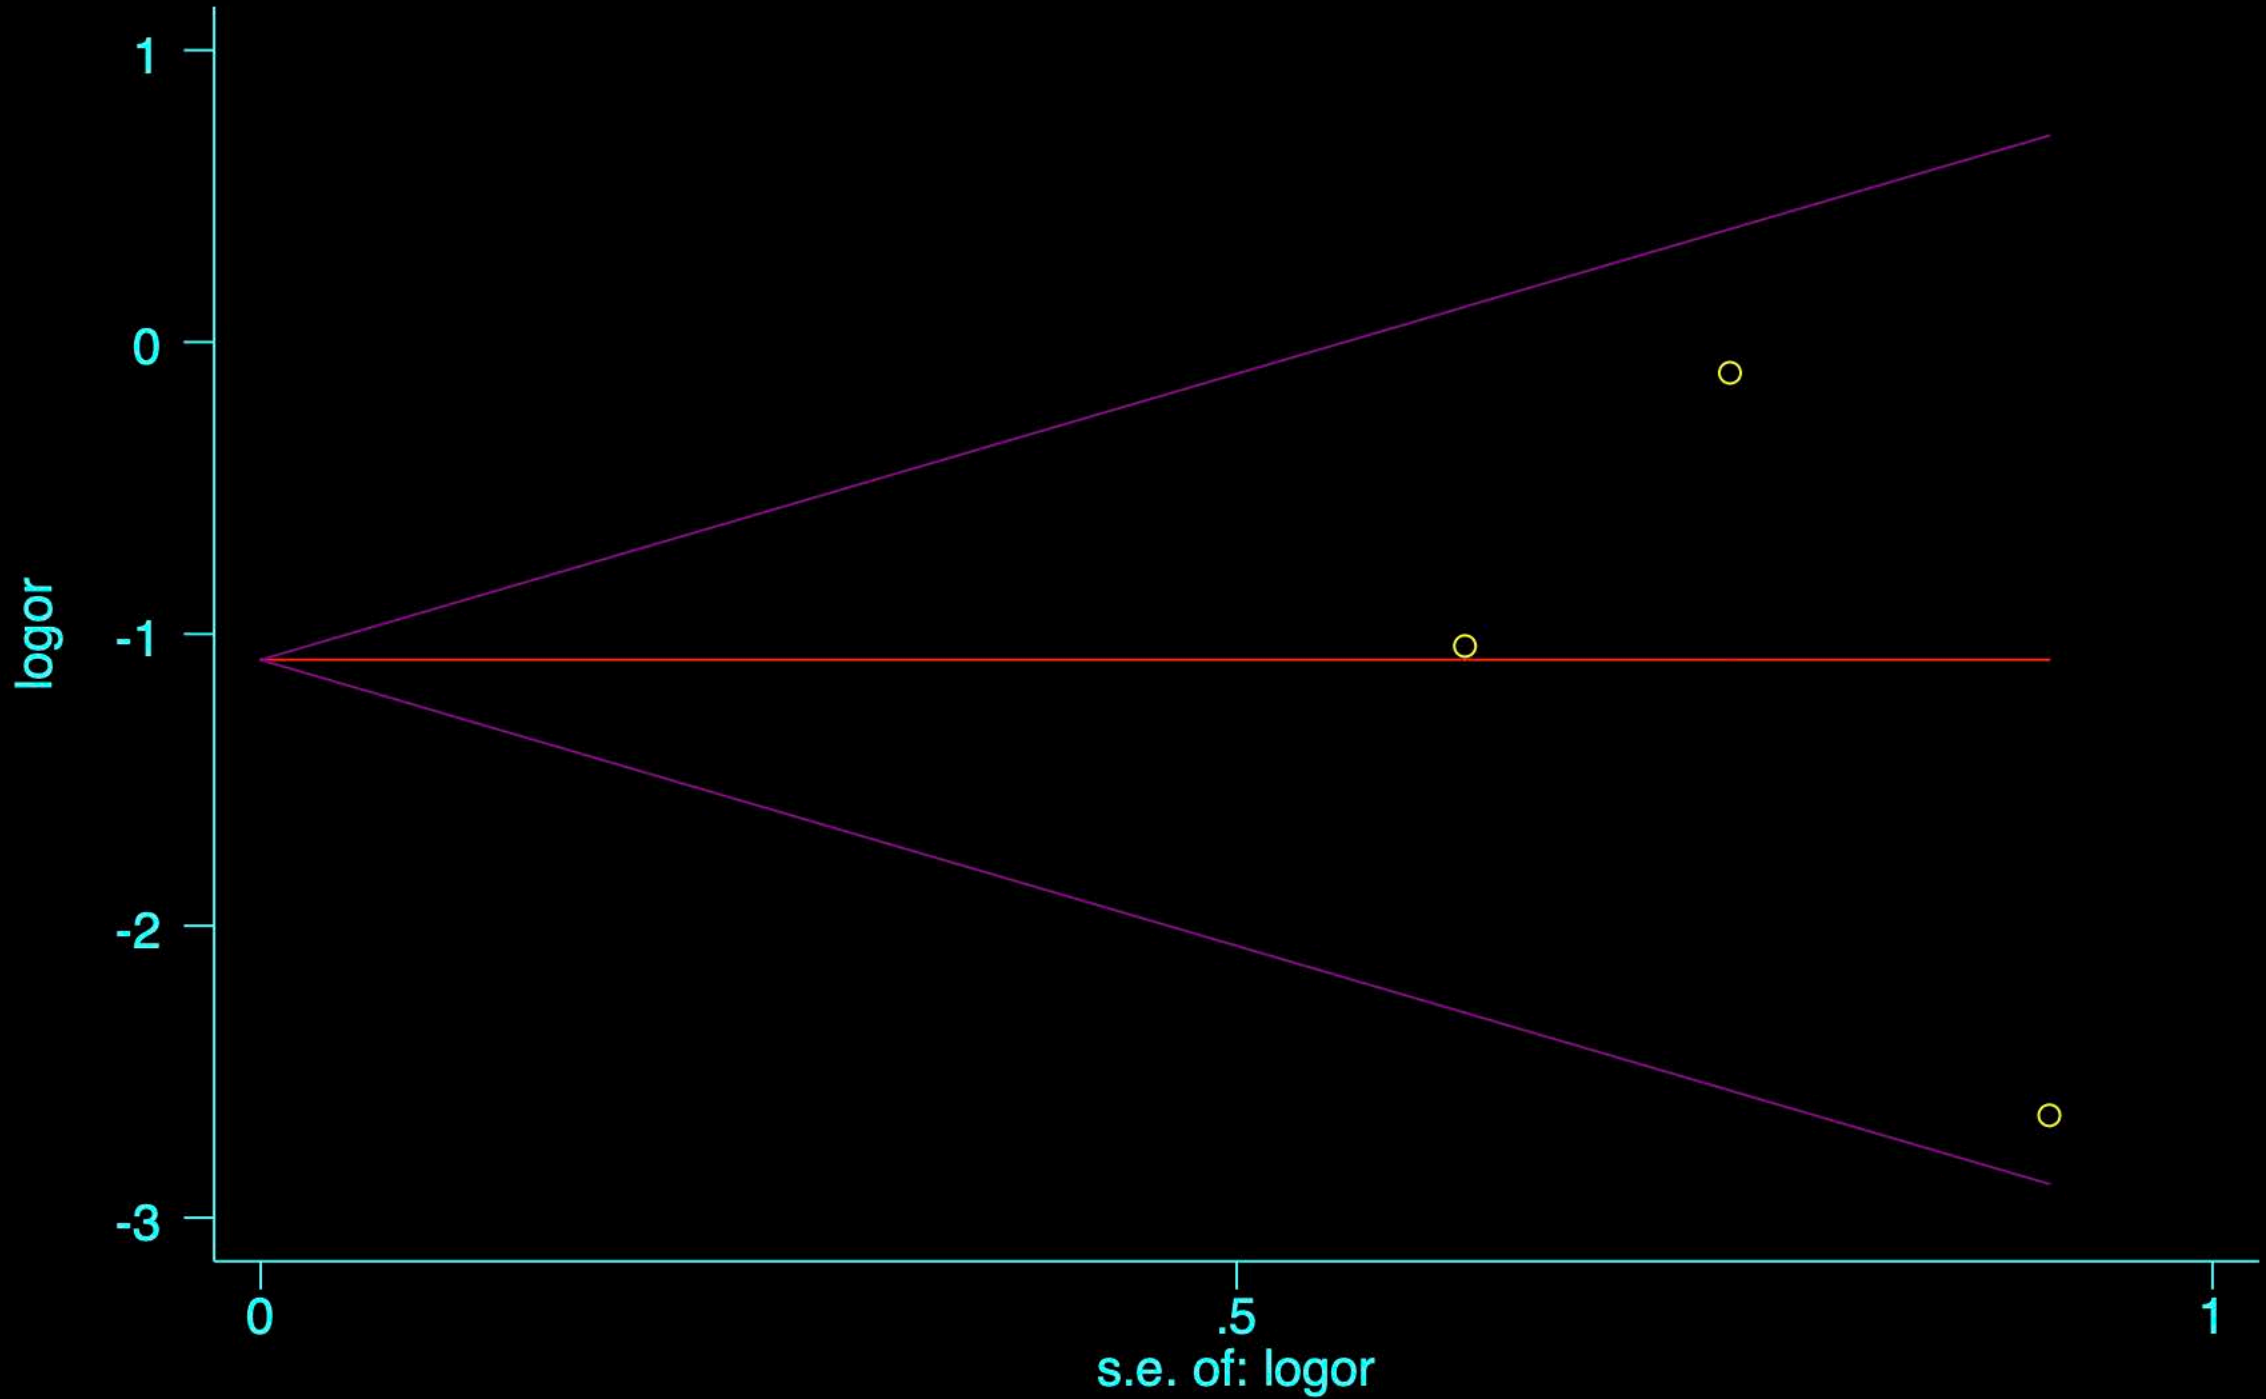

Supplement: MOESM2 [file 18293640]
